# Supplementary material for: hiPSC hepatocyte model demonstrates the role of unfolded protein response and inflammatory networks in α1-antitrypsin deficiency
Source: PubMed Central journal article supplement (PMC6562205; doi:10.1016/j.jhep.2018.05.028), 2018-10
Supplement: CTAT_table.pdf [file CTAT_table.pdf]

## Journal of Hepatology

### CTAT methods

Tables for a “Complete, Transparent, Accurate and Timely account” (CTAT) are now mandatory for all revised submissions. The aim is to enhance the reproducibility of methods.

- Only include the parts relevant to your study
- Refer to the CTAT in the main text as ‘Supplementary CTAT Table’
- Do not add subheadings
- Add as many rows as needed to include all information
- Only include one item per row

**If the CTAT form is not relevant to your study, please outline the reasons why:**

|                                                                  |
|------------------------------------------------------------------|
| Detailed methods are also listed in the Supplementary Materials. |
|------------------------------------------------------------------|

#### 1.1 Antibodies

| Name                            | Supplier    | Cat no.       |
|---------------------------------|-------------|---------------|
| Rb pAb anti human A1AT          | Sigma       | A0409         |
| Rb pAb anti human ALB           | R&D Systems | MAB1455       |
| Rb pAb anti human HNF4 $\alpha$ | Santa Cruz  | sc-8987 H-171 |
| Rb mAb anti human AKR1B10       | Abcam       | ab192865      |

#### 1.2 Cell lines

| Name                                              | Citation | Supplier | Cat no. | Passage no. | Authentication test method |
|---------------------------------------------------|----------|----------|---------|-------------|----------------------------|
| hiPSCs derived in-lab (Rashid et al., JCI, 2010). |          |          |         |             |                            |

#### 1.3 Organisms

| Name           | Citation | Supplier | Strain | Sex | Age | Overall n number |
|----------------|----------|----------|--------|-----|-----|------------------|
| Not applicable |          |          |        |     |     |                  |

#### 1.4 Sequence based reagents

| Name                                 | Forward primer sequence    | Reverse primer sequence   |
|--------------------------------------|----------------------------|---------------------------|
| Ubiquitin C                          | ATTTGGGTCGCGGTTCTTG        | TGCCTTGACATTCTCGATGGT     |
| Porphobilinogen deaminase            | GGAGCCATGTCTGGTAACGG       | CCACGCGAATCACTCTCATCT     |
| Ribosomal protein, large, P0         | GGCGTCCTCGTGAAGTGAC        | GCCTTGCGCATCATGGTGTT      |
| $\alpha$ 1-antitrypsin               | AGACCCTTTGAAGTCAAGCGACC    | CCATTGCTGAAGACCTTAGTGATGC |
| $\alpha$ -fetoprotein                | AGAACCTGTCAAGCTGTG         | TGGTAGCCAGGTCAGCTAAA      |
| Albumin                              | CCTTTGGCACAATGAAGTGGGTAACC | GACAGCAAGCTGAGGATGTC      |
| Cytochrome P450, 3A4                 | TGTGCCTGAGAACACCAGAG       | GTGGTGGAATAGTCCCGTG       |
| Cytochrome P450, 3A7                 | GAAACACAGATCCCCCTGAA       | TCAGGCTCCACTTACGGTCT      |
| Hepatocyte nuclear factor 4 $\alpha$ | CATGGCCAAGATTGACAACCT      | TTCCCATATGTTCTGCATCAG     |
| Calreticulin                         | GGCACTTGGATCCACCCAGA       | CTGCTGCCTTTGTTACGCC       |
| Calnexin                             | GTCCCCGGGAGGCTAGAGATCA     | AGGAGGAGCAGTGGTATCTGGT    |
| Caspase 4                            | ACAGAGGCTGTTCCCTATGGC      | AGCCTCCATATTCGGATGAGCTTT  |
| Interleukin 18                       | AGCTGAAGATGATGAAAACCTGGA   | GCCATACCTCTAGGCTGGCT      |

#### 1.5 Biological samples

| Description                 | Source                                |
|-----------------------------|---------------------------------------|
| Human liver biopsy sections | King's College London Liver Institute |

#### 1.6 Deposited data

| Name of repository | Identifier                    | Link                                                                       |
|--------------------|-------------------------------|----------------------------------------------------------------------------|
| RNA-seq data       | accession number E-MTAB-6781. | <a href="http://www.ebi.ac.uk/arrayexpress">www.ebi.ac.uk/arrayexpress</a> |

#### 1.7 Software

| Software name   | Manufacturer | Version |
|-----------------|--------------|---------|
| Not applicable. |              |         |

#### 1.8 Other (e.g. drugs, proteins, vectors etc.)

|                 |
|-----------------|
| Not applicable. |
|-----------------|

#### 1.9 Please provide the details of the corresponding methods author for the manuscript:

|                                        |
|----------------------------------------|
| Prof. Ludovic Vallier: lv225@cam.ac.uk |
|----------------------------------------|

#### 2.0 Please confirm for randomised controlled trials all versions of the clinical protocol are included in the submission. These will be published online as supplementary information.

|                 |
|-----------------|
| Not applicable. |
|-----------------|
